# Supplementary material
Source: PubMed Central journal article supplement (PMC2832168)

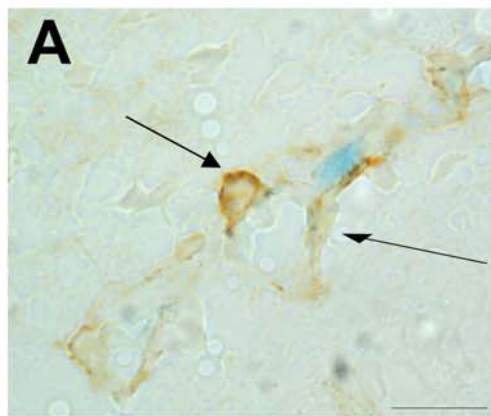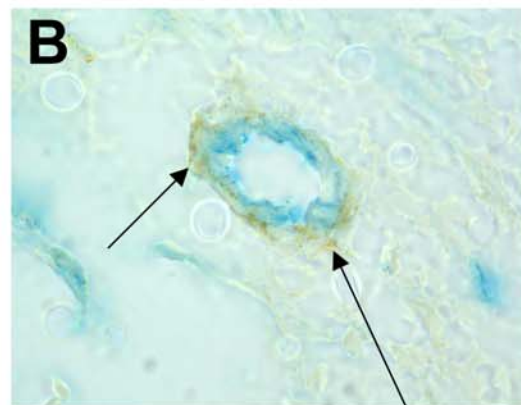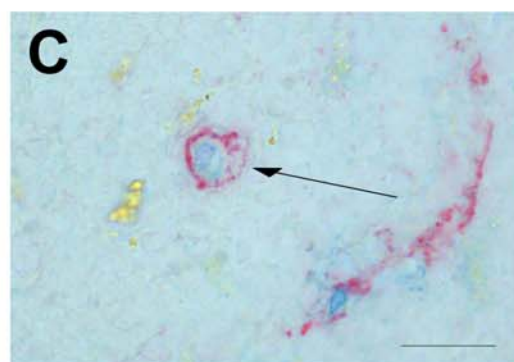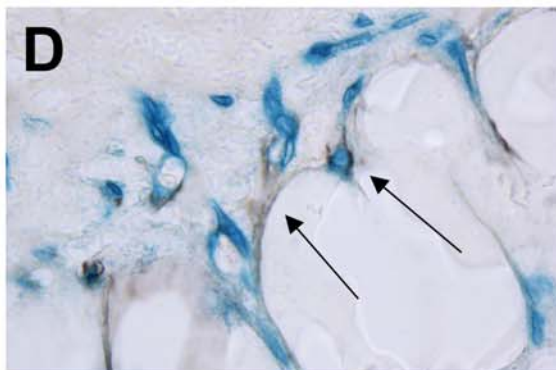

Koo et al, Fig. S1

Supplement: mmc1.pdf [file mmc1.pdf]

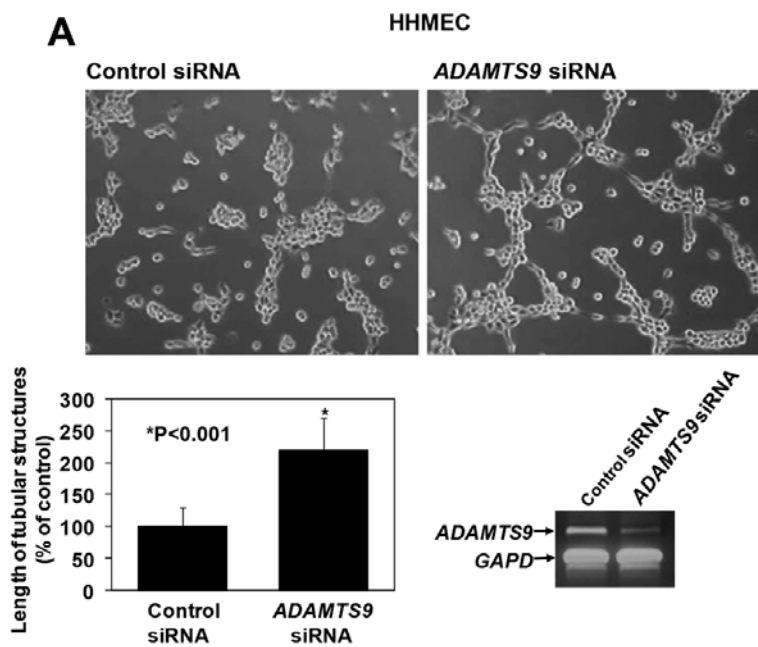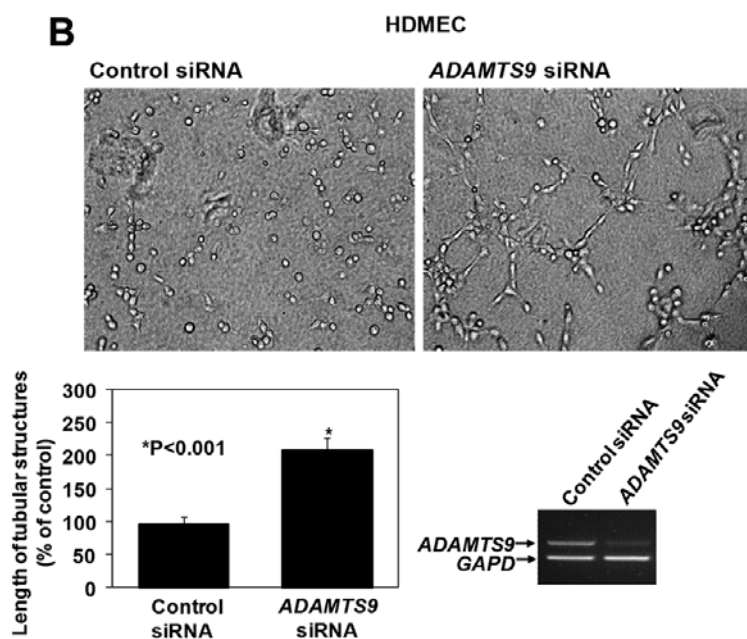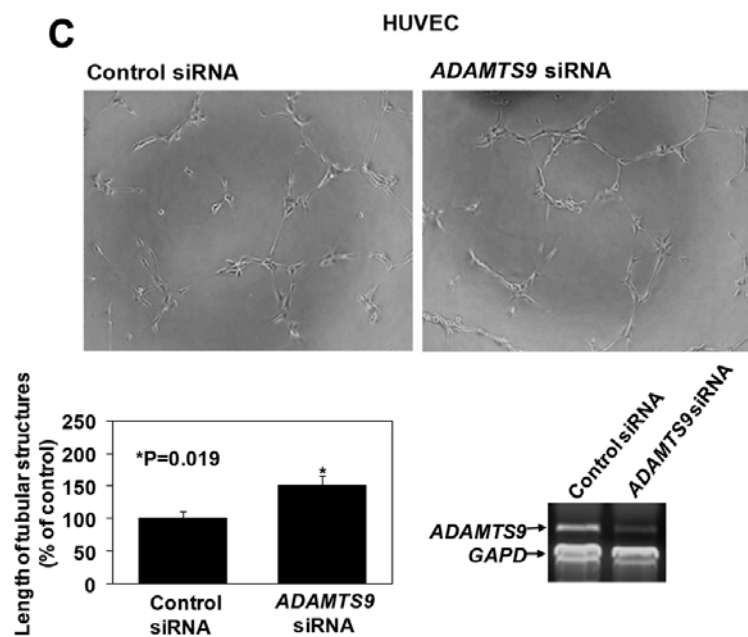

Supplement: mmc2.pdf [file mmc2.pdf]

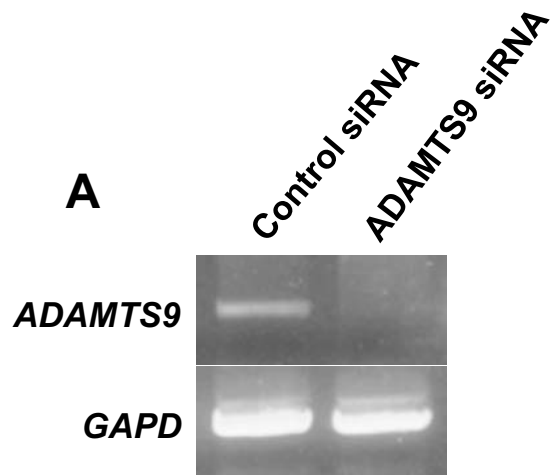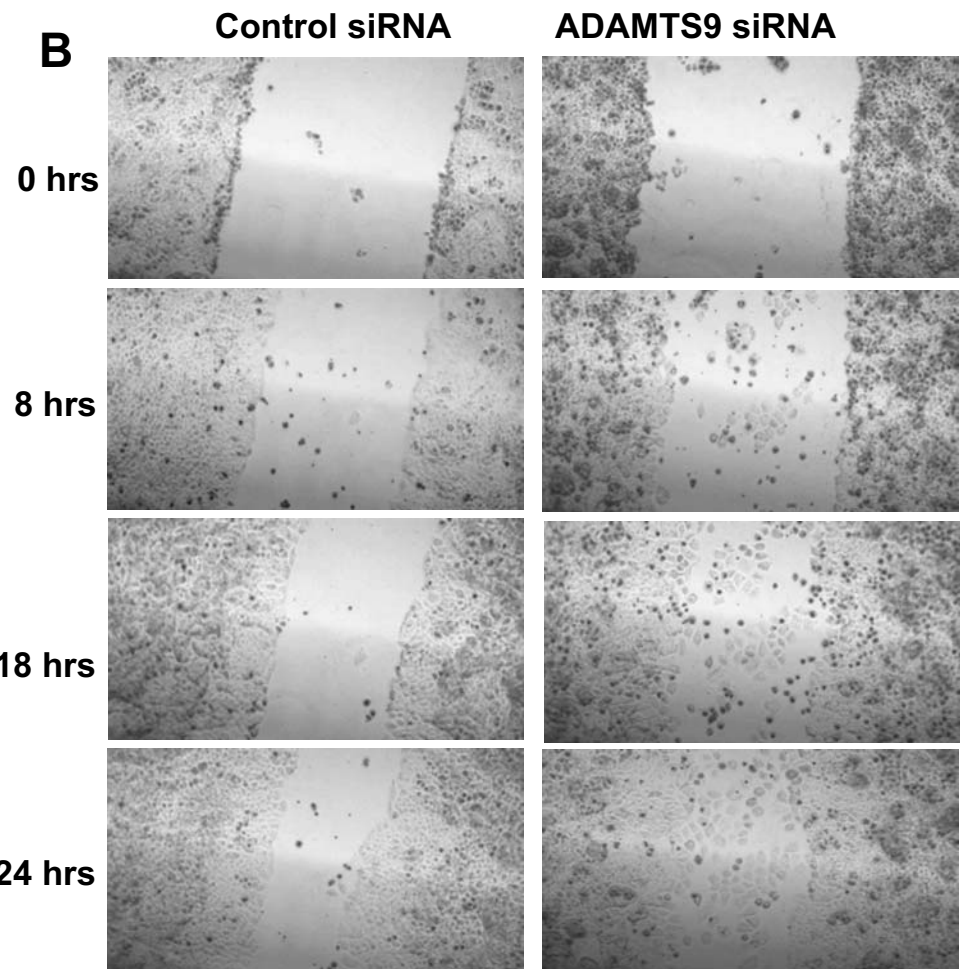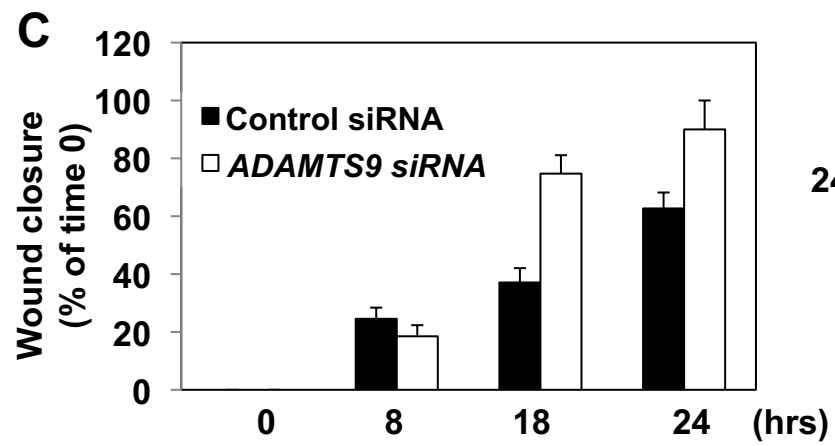

Supplement: mmc3.pdf [file mmc3.pdf]

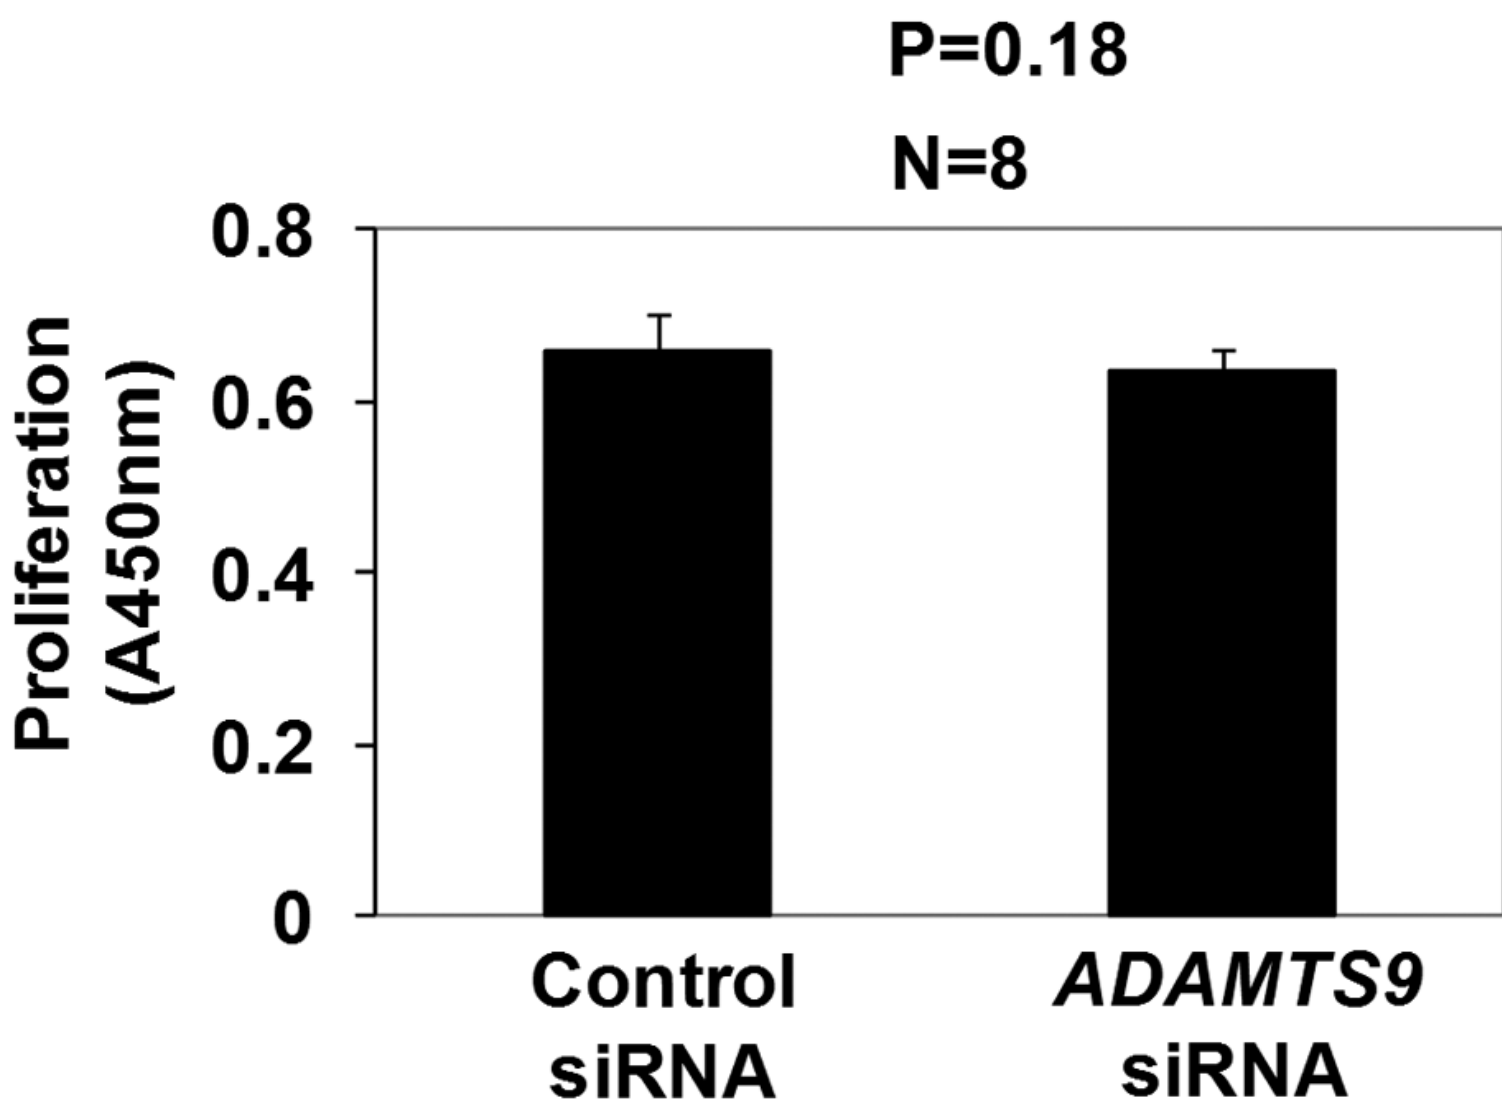

**Koo et al, Fig. S4**

Supplement: mmc4.pdf [file mmc4.pdf]

**A**

Vector

ADAMTS9 N-L2

ADAMTS9 N-L2 E<sup>435</sup>A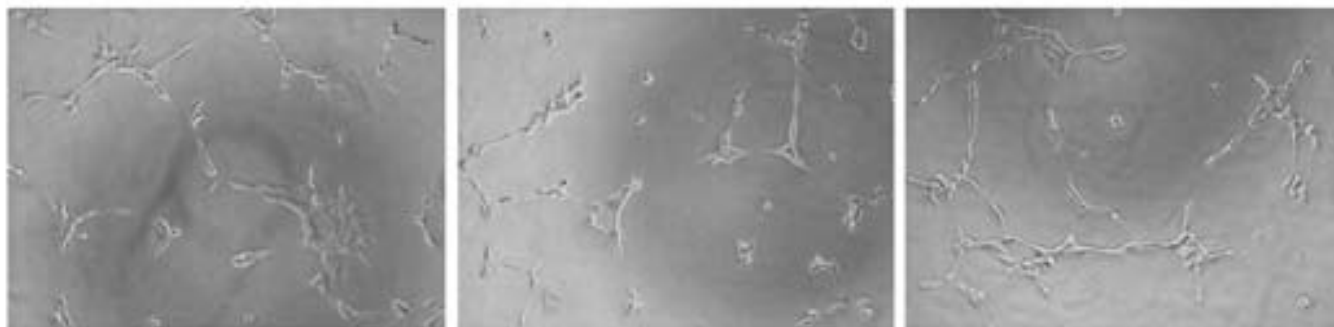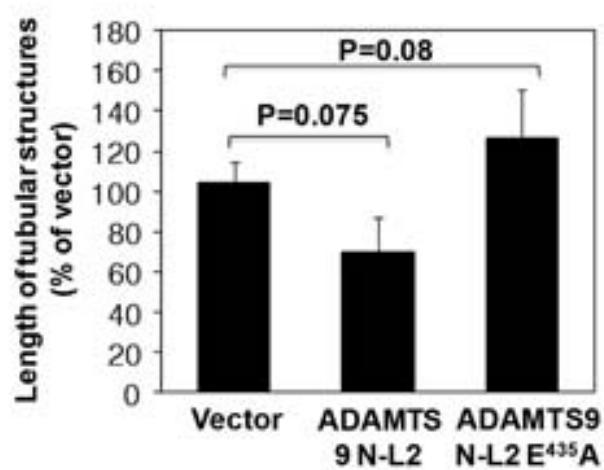**B**Vector  
ADAMTS9 N-L2  
ADAMTS9 N-L2 E<sup>435</sup>A

kDa

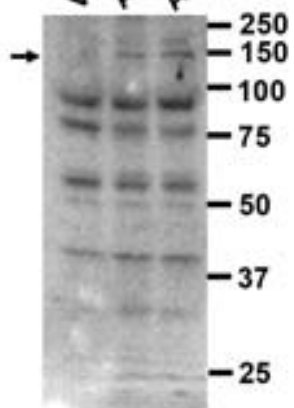

IB: Anti-myc

Supplement: mmc5.pdf [file mmc5.pdf]
